# Supplementary material for: Preparation and Characterization of Alkaline and Acidic Heterogeneous Carbon‐Based Catalysts and Their Application in Vegetable Oil Transesterification to Obtain Biodiesel
Source: Hindawi journal article supplement (doi:10.1155/2022/7056220), 2022-01-01
Supplement: f1 [file 7056220.f1.docx]

**SUPPORTING INFORMATION**

*Characterization of main surface parameters of supports and heterogeneous catalysts*

XRD patterns were recorded in a PANalytical Empyrean X-Ray diffractometer using the Bragg-Brentano configuration with CuKα1 radiation. X-ray tube was operated at 45 kV and 40 mA where the 2θ angle of the diffractometer was stepped from 10 ° to 60 ° scan rate with a step size of 0.02 °. XRF analysis was done with an Epsilon 4 spectrometer using an X-ray metal – ceramic tube with a window of Be of 50 μm. The tube was operated at 50 kV, 3.0 mA and 15 W. FTIR spectra were recorded with a Thermo Scientific Nicolet iS10 FTIR spectrophotometer. These spectra were determined in the region of 4000 - 400 cm-1 with a resolution of 4 cm-1 and 32 scans. Samples were dispersed in KBr reagent to be measured as pellets. N2 physisorption at -196 °C was quantified using an ASAP 2020 (Micrometrics) equipment. SEM/EDS analysis was carried with a scanning electron microscope (TM3000 Hitachi).

*Chromatography conditions to quantify FAMEs content in oil transesterification*

FAMEs content was determined with a GC equipment with a flame ionization detector (FID) and a 5% Diphenyl-95% dimethylarylenesiloxane TG-5 SILMS column with dimension of 30 m x 0.25 mm x 0.25 μm. Chromatography conditions were an injection temperature of 250 °C, splitless mode, column He flow of 2.5 mL/min; detector temperature of 300 °C, column temperature program of 40 °C for 2.5 min, 10 °C/min to 280 °C and 280 °C for 10 min.

*ANOVA of experimental designs*

The statistical analysis of results from the experimental design was performed with the next equations

where *ndat* is the total number of experimental data, *nFi* is the number of experimental runs under the level *i*, *Fi* is obtained from the sum of the response variable for the experimental runs under the level *i*, *yi* is the value of the *S/N* ratio, *SST* is the total sum of squares, *Tt* is the sum of the response variable for all experimental runs, *kF* is the number of levels of factor *F* (i.e. the variable analyzed in the catalysts synthesis), *vF* is the degrees of freedom of factor *F* (i.e., *kF* – 1), *σF* is the variance for factor *F* and *SSF* is the sum of squares for factor *F*, respectively. Table S1 shows the results of ANOVA for the experimental designs tested in the preparation of heterogeneous catalysts with different acidic and alkaline solutions.

Table S1. Results of ANOVA for the experimental designs used to prepare acidic and alkaline heterogeneous catalysts for obtaining biodiesel via transesterification of safflower oil with methanol.

| *Catalyst* | *Variable used in preparation of catalysts* | *SSF* | *σF* |
| --- | --- | --- | --- |
| Citric acid | Time of biomass pyrolysis, h | 0.0551 | 0.0275 |
| Citric acid concentration, M | 0.1324 | 0.0662 |
| Time of thermal treatment at 150 °C, h | 0.2420 | 0.1211 |
| Calcium concentration, M | 0.2219 | 0.1110 |
| Tartaric acid | Time of biomass pyrolysis, h | 0.4148 | 0.2074 |
| Tartaric acid concentration, M | 0.3083 | 0.1541 |
| Time of thermal treatment at 150 °C, h | 0.2795 | 0.1398 |
| Calcium concentration, M | 0.2717 | 0.1359 |
| Sulfuric acid | Time of biomass pyrolysis, h | 0.3316 | 0.1658 |
| Sulfuric acid concentration, M | 1.0419 | 0.5210 |
| Time of thermal treatment at 150 °C, h | 1.1343 | 0.5671 |
| Calcium concentration, M | 1.0435 | 0.5218 |
| Potassium hydroxide | Time of biomass pyrolysis, h | 9.9312 | 4.9656 |
| Potassium hydroxide concentration, M | 15.4806 | 7.7403 |
| Time of thermal treatment at 150 °C, h | 1.2531 | 0.6266 |
| Calcium concentration, M | 9.8451 | 4.9225 |
